# Supplementary material
Source: PubMed Central journal article supplement (PMC3140957)
Supplement: NIHMS305470-supplement-supplement_1.pdf [file NIHMS305470-supplement-supplement_1.pdf]

## Supplementary Materials for Regulation of the 26S Proteasome Complex During Oxidative Stress

Xiaorong Wang, James Yen, Peter Kaiser,\* Lan Huang\*

\*To whom correspondence should be addressed. E-mail: lanhuang@uci.edu (L.H.); pkaiser@uci.edu (P.K.)

Published 7 December 2010, *Sci. Signal.* **3**, ra88 (2010)

DOI: 10.1126/scisignal.2001232

### The PDF file includes:

Fig. S1. Average SILAC ratios (L/H) of the yeast 19S and 20S subunits purified with the 20S subunit Pre10-TAP after oxidative stress.

Fig. S2. Quantitative comparison of the composition of the 26S proteasome purified by Rpn11-TAP from wild-type and *ecm29Δ* cells with the SILAC-MS method.

Fig. S3. Yap1-independent enrichment of Ecm29 in purified 19S complexes.

Fig. S4. In-gel proteasome activities in *ecm29Δ* cells after H<sub>2</sub>O<sub>2</sub>-induced stress.

Fig. S5. Validation of H<sub>2</sub>O<sub>2</sub>-triggered separation of the 20S core from the 19S particle in human cells by Western blotting analysis.

Fig. S6. Presence of Ecm29 in purified 19S subunits is independent of the salt concentration used during affinity purification.

Fig. S7. Reassembly of the 26S proteasome after 3 mM H<sub>2</sub>O<sub>2</sub>-induced stress.

Table S1. Identification and quantitation of proteasome subunits by SILAC-MS in Rpn11-TAP-expressing cells before and after treatment with H<sub>2</sub>O<sub>2</sub>.

Table S2. Identification and quantitation of proteasome subunits and Ecm29 by SILAC-MS in Pre10-TAP-expressing cells before and after treatment with H<sub>2</sub>O<sub>2</sub>.

Table S3. Identification and quantitation of the known PIPs by SILAC-MS in Rpn11-TAP-expressing cells before and after treatment with H<sub>2</sub>O<sub>2</sub>.

Table S4. SILAC-based quantitative comparison of the composition of the 26S proteasome in wild-type and *ecm29Δ* cells in the absence of H<sub>2</sub>O<sub>2</sub>-induced stress.

Table S5. SILAC-based quantitative comparison of the composition of the 26S proteasome in wild-type and *ecm29Δ* cells after H<sub>2</sub>O<sub>2</sub>-induced stress.

Table S6. Yeast strains generated for this study.

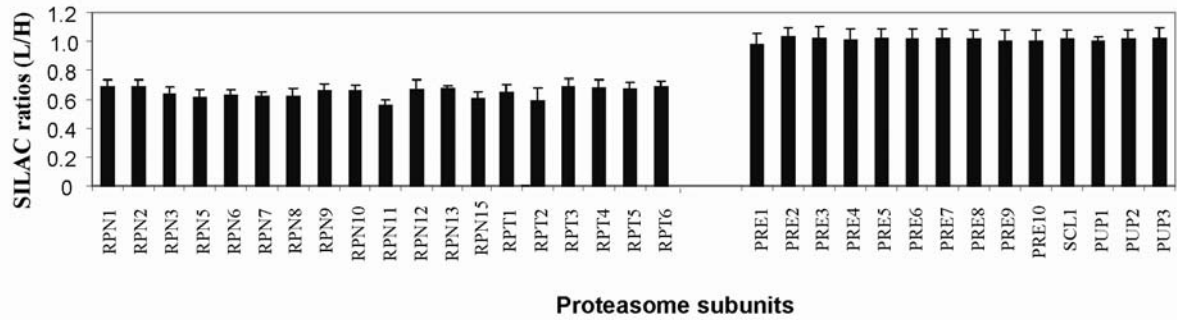

**Fig. S1.** Average SILAC ratios (L/H) of the yeast 19S and 20S subunits purified with the 20S subunit Pre10-TAP after oxidative stress. Proteasomes were purified from cells whose abundance of Pre10-TAP was similar to that of endogenous Pre10. The light (L) cultures were treated with 3 mM H<sub>2</sub>O<sub>2</sub> and the heavy (H) culture was untreated. All ratios were normalized to that of Pre10. Detailed results are summarized in table S3.

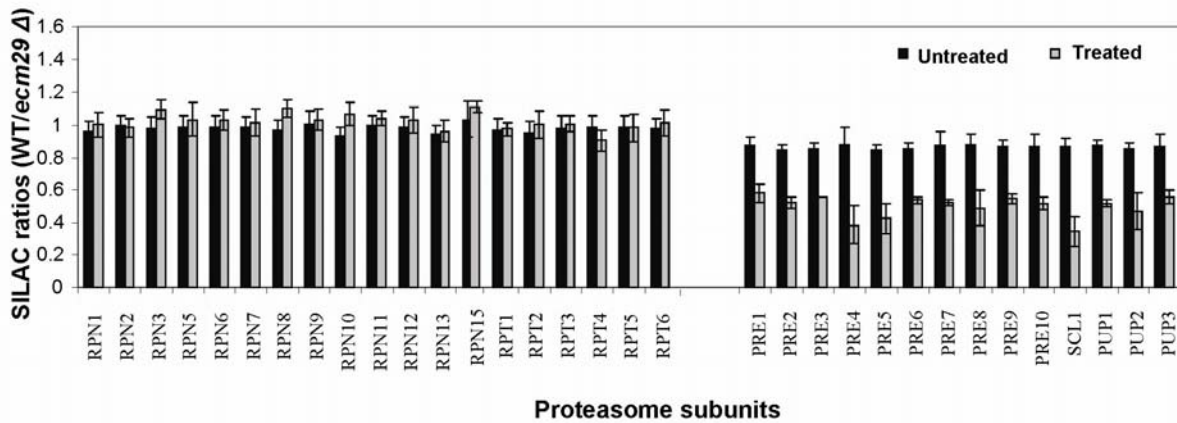

**Fig. S2.** Quantitative comparison of the composition of the 26S proteasome purified by Rpn11-TAP from wild-type and *ecm29Δ* cells with the SILAC-MS method. The plots of the average SILAC ratios (L/H) represent changes in the abundances of proteasome subunits when comparing wild-type and *ecm29Δ* cells without treatment (black) or after exposure to 3 mM H<sub>2</sub>O<sub>2</sub> for 30 min (gray). The wild-type cells were grown in light (L) media and *ecm29Δ* cells were grown in heavy (H) media. Cells contained amounts of Rpn11-TAP that were similar to that of endogenous Rpn11. All ratios were normalized to that of Rpn11. Detailed results are summarized in tables S4 and S5.

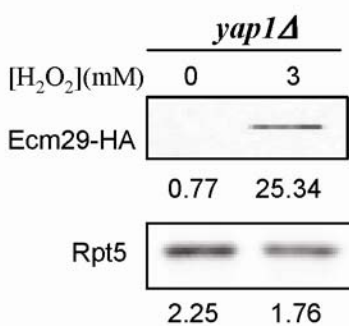

**Fig. S3.** Yap1-independent enrichment of Ecm29 in purified 19S complexes. The proteasome complexes were purified from *yap1Δ* cells expressing Rpn11-TAP before and after treatment with 3mM H<sub>2</sub>O<sub>2</sub> for 30 min. The abundances of Ecm29-HA protein bound to the purified proteasomes from untreated and treated cells were measured by Western blotting with an antibody against the HA tag. The 19S subunit Rpt5 was detected with a specific antibody.

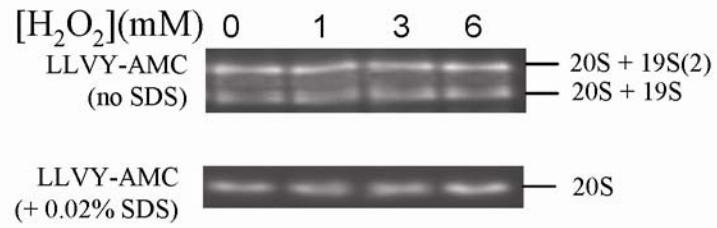

**Fig. S4.** In-gel proteasome activities in *ecm29Δ* cells after H<sub>2</sub>O<sub>2</sub>-induced stress. Total lysates from cells treated with the indicated concentrations of H<sub>2</sub>O<sub>2</sub> were resolved by native gel electrophoresis. The chymotrypsin-like activity was measured by a native gel overlay assay with the fluorogenic peptide substrate SUC-LLVY-AMC in the absence or presence of 0.02% SDS for 26S and 20S proteasomes, respectively.

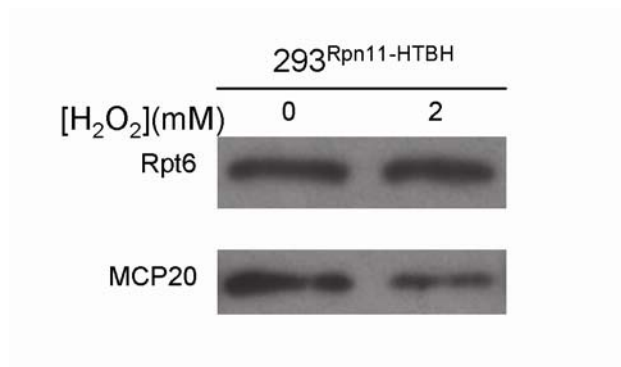

**Fig. S5.** Validation of H<sub>2</sub>O<sub>2</sub>-triggered separation of the 20S core from the 19S particle in human cells by Western blotting analysis. The 26S proteasome was affinity purified from HEK 293<sup>Rpn11-HTBH</sup> cells with Rpn11-HTBH and the composition of the complex was analyzed by Western blotting with antibodies against Rpt6 (a 19S subunit) and MCP20 (a 20S subunit).

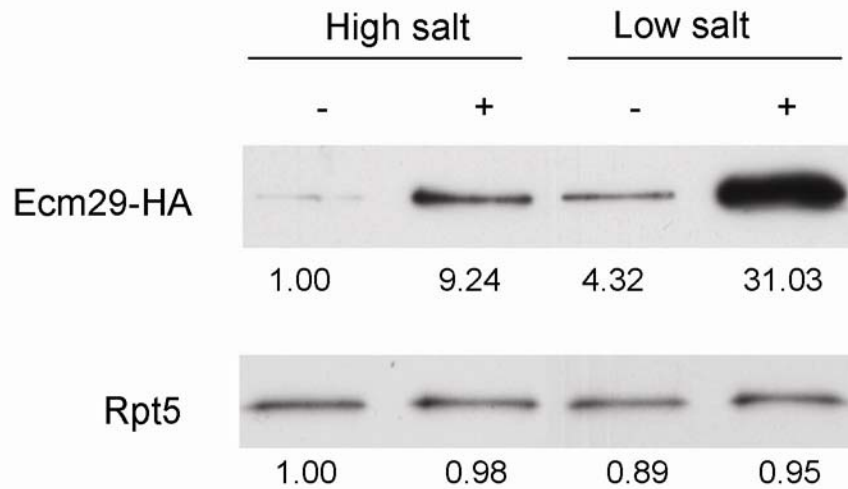

**Fig. S6.** Presence of Ecm29 in purified 19S subunits is independent of the salt concentration used during affinity purification. Affinity purification of 26S proteasomes was performed with cells containing Rpn11-TAP that were either untreated or exposed to 3 mM H<sub>2</sub>O<sub>2</sub> for 30 min. Proteasomes were purified in low-salt buffer (25 mM tris, 5 mM NaF, 2.5 mM Na<sub>4</sub>P<sub>2</sub>O<sub>7</sub>) or high-salt buffer (100 mM NaCl, 50 mM tris, 50 mM NaF, 10 mM Na<sub>4</sub>P<sub>2</sub>O<sub>7</sub>). The purified samples were analyzed by quantitative Western blotting with antibodies against Rpt5 (a 19S subunit) and Pre10 (a 20S subunit). The number below each band represents the band intensity obtained with an Odyssey Infrared Imaging System for quantitation.

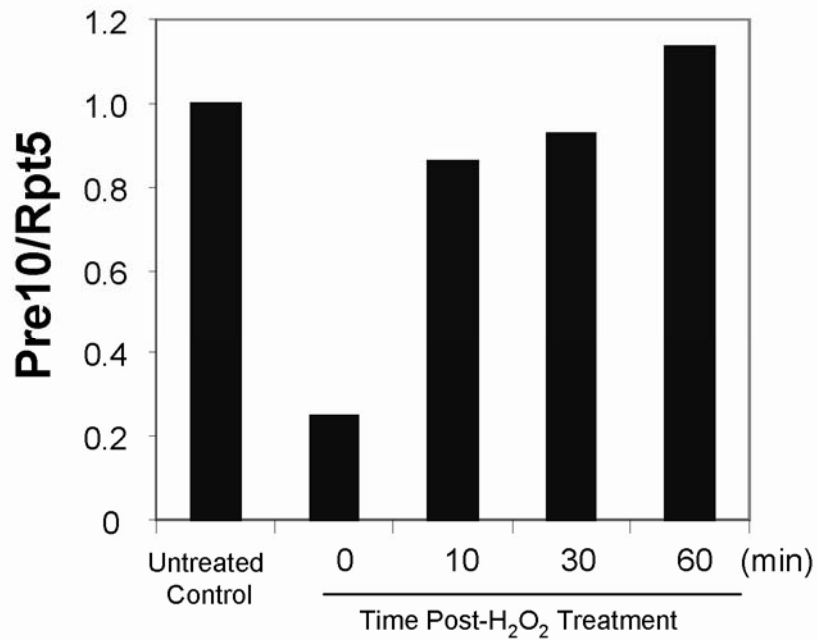

**Fig. S7.** Reassembly of the 26S proteasome after 3 mM H<sub>2</sub>O<sub>2</sub>-induced stress. Proteasomes were affinity purified from yeast cells that contained Rpn11-TAP at an abundance similar to that of endogenous Rpn11. Cells were first treated with 3mM H<sub>2</sub>O<sub>2</sub> for 30 min at 30°C, after which the medium containing H<sub>2</sub>O<sub>2</sub> was removed, cells were washed twice with fresh medium, and were incubated in fresh medium for the indicated times. Proteasomes were purified and the ratio between the abundances of Pre10 (a 20S subunit) and Rpt5 (a 19S subunit) was determined by quantitative Western blotting.



**Table S1.** Identification and quantitation of proteasome subunits by SILAC-MS in Rpn11-TAP-expressing cells before and after treatment with H<sub>2</sub>O<sub>2</sub>.

|      | Name    | Acc #     | 1 mM H2O2  |         |                 |                             |                      |       | 3 mM H2O2  |       |                 |                             |                      |       | 6 mM H2O2  |         |                 |                             |                      |       |
|------|---------|-----------|------------|---------|-----------------|-----------------------------|----------------------|-------|------------|-------|-----------------|-----------------------------|----------------------|-------|------------|---------|-----------------|-----------------------------|----------------------|-------|
|      |         |           | Num Unique | % Cov   | Best Expect Val | # Pep used for SILAC Ratios | Average SILAC Ratios | STDEV | Num Unique | % Cov | Best Expect Val | # Pep used for SILAC Ratios | Average SILAC Ratios | STDEV | Num Unique | % Cov   | Best Expect Val | # Pep used for SILAC Ratios | Average SILAC Ratios | STDEV |
| 19S  | RPN1    | YHR027C   | 128        | 65.3    | 9.5E-11         | 81                          | 1.026                | 0.086 | 196        | 80.9  | 4E-14           | 99                          | 0.992                | 0.084 | 168        | 70.1    | 5.9E-12         | 85                          | 0.997                | 0.093 |
|      | RPN2    | YIL075C   | 146        | 60.3    | 2E-09           | 95                          | 1.008                | 0.083 | 187        | 66    | 2E-12           | 93                          | 0.981                | 0.087 | 151        | 61.3    | 1.9E-10         | 76                          | 1.000                | 0.092 |
|      | RPN3    | YER021W   | 71         | 57.6    | 8.9E-10         | 48                          | 0.997                | 0.105 | 102        | 75.3  | 1E-13           | 57                          | 0.965                | 0.093 | 77         | 63.9    | 2.8E-11         | 54                          | 1.025                | 0.096 |
|      | RPN5    | YDL147W   | 63         | 65.6    | 2.6E-09         | 44                          | 0.992                | 0.092 | 95         | 75.7  | 8E-13           | 63                          | 0.967                | 0.100 | 66         | 61.1    | 8.1E-11         | 38                          | 1.037                | 0.099 |
|      | RPN6    | YDL097C   | 67         | 59.2    | 5.9E-10         | 45                          | 0.971                | 0.079 | 91         | 73.3  | 9E-14           | 41                          | 0.970                | 0.076 | 65         | 70.3    | 2.7E-10         | 36                          | 0.984                | 0.083 |
|      | RPN7    | YPR108W   | 62         | 55.5    | 6.6E-09         | 44                          | 0.981                | 0.098 | 82         | 66.7  | 2E-12           | 51                          | 0.966                | 0.102 | 74         | 67.8    | 5E-10           | 38                          | 1.012                | 0.074 |
|      | RPN8    | YOR261C   | 57         | 79.3    | 8.4E-10         | 36                          | 1.006                | 0.089 | 65         | 80.8  | 1E-13           | 39                          | 0.963                | 0.087 | 59         | 79.3    | 5.4E-11         | 35                          | 1.002                | 0.095 |
|      | RPN9    | YDR427W   | 70         | 59      | 5.5E-09         | 44                          | 0.993                | 0.092 | 104        | 69.5  | 1E-12           | 62                          | 0.993                | 0.107 | 78         | 66.2    | 6.1E-10         | 42                          | 1.010                | 0.087 |
|      | RPN10   | YHR200W   | 36         | 54.9    | 2.7E-10         | 20                          | 1.021                | 0.099 | 39         | 56.7  | 3E-13           | 24                          | 0.965                | 0.054 | 38         | 55.6    | 2.5E-11         | 19                          | 1.033                | 0.128 |
|      | RPN11   | YFR004W   | 48         | 61.1    | 8.8E-11         | 24                          | 1.000                | 0.068 | 66         | 74.8  | 5E-13           | 34                          | 1.000                | 0.098 | 54         | 69      | 1E-09           | 29                          | 1.000                | 0.076 |
|      | RPN12   | YFR052W   | 52         | 74.8    | 3.9E-09         | 37                          | 0.995                | 0.096 | 69         | 82.1  | 1E-13           | 37                          | 0.980                | 0.087 | 60         | 79.9    | 1.8E-12         | 29                          | 1.047                | 0.117 |
|      | RPN13   | YLR421C   | 22         | 59.6    | 1.3E-08         | 6                           | 1.061                | 0.084 | 23         | 68.6  | 2E-12           | 14                          | 0.920                | 0.081 | 21         | 65.4    | 1.2E-11         | 12                          | 0.959                | 0.077 |
|      | RPN15   | YDR363W-A | 9          | 73      | 3.6E-09         | 5                           | 0.966                | 0.085 | 12         | 78.7  | 6E-13           | 6                           | 1.008                | 0.118 | 11         | 77.5    | 1.4E-10         | 4                           | 0.943                | 0.039 |
|      | RPT1    | YKL145W   | 62         | 67.9    | 2.4E-09         | 46                          | 1.024                | 0.083 | 82         | 81.2  | 3E-12           | 44                          | 0.941                | 0.077 | 69         | 72.8    | 8.9E-11         | 34                          | 0.960                | 0.073 |
|      | RPT2    | YDL007W   | 73         | 76.4    | 2E-10           | 46                          | 1.040                | 0.087 | 82         | 73.7  | 1E-13           | 40                          | 0.997                | 0.084 | 71         | 71.4    | 1.3E-11         | 33                          | 1.006                | 0.096 |
|      | RPT3    | YDR394W   | 57         | 81.8    | 7.6E-11         | 31                          | 1.023                | 0.079 | 85         | 88.1  | 1E-13           | 33                          | 0.989                | 0.110 | 72         | 80.8    | 4.8E-11         | 26                          | 1.021                | 0.110 |
|      | RPT4    | YOR259C   | 62         | 63.8    | 1.4E-09         | 35                          | 1.063                | 0.097 | 88         | 74.1  | 4E-13           | 47                          | 0.931                | 0.079 | 79         | 74.6    | 3.9E-11         | 19                          | 1.089                | 0.124 |
|      | RPT5    | YOR117W   | 81         | 74.4    | 1.5E-10         | 46                          | 1.060                | 0.082 | 104        | 74.7  | 9E-14           | 58                          | 0.973                | 0.106 | 91         | 72.6    | 2.2E-11         | 37                          | 1.009                | 0.113 |
| RPT6 | YGL048C | 60        | 66.7       | 5.8E-10 | 41              | 1.039                       | 0.067                | 77    | 73.3       | 7E-13 | 46              | 0.972                       | 0.082                | 63    | 67.7       | 3.9E-10 | 31              | 1.002                       | 0.090                |       |
| 20S  | PRE1    | YER012W   | 16         | 40.4    | 1.1E-07         | 4                           | 0.882                | 0.035 | 19         | 59.1  | 9E-12           | 10                          | 0.340                | 0.060 | 14         | 42.9    | 5.2E-09         | 10                          | 0.107                | 0.037 |
|      | PRE2    | YPR103W   | 24         | 56.8    | 1.7E-09         | 16                          | 1.040                | 0.103 | 24         | 56.1  | 2E-11           | 12                          | 0.368                | 0.067 | 18         | 53.3    | 9.6E-09         | 11                          | 0.098                | 0.033 |
|      | PRE3    | YJL001W   | 21         | 71.2    | 1.5E-09         | 12                          | 1.028                | 0.155 | 25         | 74.9  | 2E-11           | 12                          | 0.380                | 0.100 | 20         | 74.9    | 2.4E-09         | 10                          | 0.167                | 0.076 |
|      | PRE4    | YFR050C   | 25         | 47.4    | 9E-10           | 15                          | 0.932                | 0.059 | 34         | 56.4  | 9E-12           | 15                          | 0.324                | 0.064 | 21         | 56.4    | 4.9E-09         | 18                          | 0.124                | 0.055 |
|      | PRE5    | YMR314W   | 26         | 70.9    | 9.9E-10         | 17                          | 0.959                | 0.122 | 37         | 82.9  | 9E-13           | 18                          | 0.344                | 0.062 | 28         | 76.1    | 7.2E-10         | 20                          | 0.142                | 0.079 |
|      | PRE6    | YOL038W   | 15         | 51.6    | 2.4E-11         | 7                           | 0.938                | 0.062 | 20         | 66.9  | 3E-13           | 14                          | 0.357                | 0.086 | 16         | 49.6    | 2.7E-11         | 13                          | 0.147                | 0.050 |
|      | PRE7    | YBL041W   | 26         | 51.5    | 1.3E-09         | 17                          | 0.972                | 0.095 | 34         | 65.1  | 7E-12           | 19                          | 0.365                | 0.058 | 25         | 55.2    | 4.1E-09         | 19                          | 0.130                | 0.042 |
|      | PRE8    | YML092C   | 29         | 51.6    | 2.5E-09         | 19                          | 0.966                | 0.075 | 34         | 52    | 3E-12           | 20                          | 0.356                | 0.073 | 27         | 52.4    | 2.2E-09         | 22                          | 0.129                | 0.059 |
|      | PRE9    | YGR135W   | 30         | 67.1    | 2.1E-09         | 19                          | 0.957                | 0.095 | 40         | 73.3  | 8E-12           | 19                          | 0.306                | 0.047 | 30         | 72.9    | 1.5E-09         | 22                          | 0.167                | 0.085 |
|      | PRE10   | YOR362C   | 24         | 51      | 1.2E-08         | 11                          | 0.978                | 0.088 | 37         | 60.4  | 1E-11           | 19                          | 0.331                | 0.078 | 28         | 60.1    | 1.7E-10         | 21                          | 0.163                | 0.090 |
|      | SCL1    | YGL011C   | 50         | 73.8    | 3.4E-10         | 22                          | 0.946                | 0.099 | 52         | 77.8  | 7E-12           | 27                          | 0.344                | 0.068 | 44         | 76.6    | 1.2E-09         | 32                          | 0.150                | 0.074 |
|      | PUP1    | YOR157C   | 12         | 28      | 4E-07           | 7                           | 0.984                | 0.066 | 15         | 31    | 1E-10           | 9                           | 0.377                | 0.070 | 11         | 31      | 4.3E-07         | 6                           | 0.088                | 0.054 |
|      | PUP2    | YGR253C   | 24         | 78.5    | 3.5E-10         | 15                          | 0.948                | 0.075 | 30         | 86.5  | 1E-10           | 15                          | 0.367                | 0.067 | 21         | 66.5    | 8.6E-10         | 16                          | 0.142                | 0.056 |
|      | PUP3    | YER094C   | 20         | 61.5    | 1.8E-10         | 8                           | 0.991                | 0.063 | 20         | 61.5  | 5E-13           | 13                          | 0.336                | 0.067 | 12         | 39.5    | 1.8E-10         | 9                           | 0.101                | 0.035 |

SILAC ratios: treated /untreated, normalized to Rpn11

**Table S2.** Identification and quantitation of proteasome subunits and Ecm29 by SILAC-MS in Pre10-TAP-expressing cells before and after treatment with H<sub>2</sub>O<sub>2</sub>.

|      | Protein Name | Acc #   | Num Unique | % Cov   | Best Expect Val | # Pep used for SILAC Ratios | Average SILAC Ratios | STDEV |
|------|--------------|---------|------------|---------|-----------------|-----------------------------|----------------------|-------|
| 19S  | RPN1         | YHR027C | 89         | 42.4    | 2.7E-10         | 54                          | 0.686                | 0.048 |
|      | RPN2         | YIL075C | 94         | 43.1    | 1.3E-10         | 70                          | 0.687                | 0.049 |
|      | RPN3         | YER021W | 46         | 49.9    | 6.7E-09         | 34                          | 0.641                | 0.048 |
|      | RPN5         | YDL147W | 43         | 43.4    | 3E-09           | 36                          | 0.619                | 0.050 |
|      | RPN6         | YDL097C | 36         | 38.2    | 3.2E-09         | 29                          | 0.629                | 0.046 |
|      | RPN7         | YPR108W | 36         | 35.9    | 1.6E-08         | 30                          | 0.624                | 0.036 |
|      | RPN8         | YOR261C | 34         | 57.1    | 5E-08           | 25                          | 0.627                | 0.054 |
|      | RPN9         | YDR427W | 48         | 45.5    | 4.5E-09         | 41                          | 0.661                | 0.052 |
|      | RPN10        | YHR200W | 22         | 41.8    | 2.7E-09         | 20                          | 0.662                | 0.041 |
|      | RPN11        | YFR004W | 27         | 42.8    | 4.7E-08         | 20                          | 0.564                | 0.035 |
|      | RPN12        | YFR052W | 32         | 52.6    | 9.8E-10         | 22                          | 0.674                | 0.062 |
|      | RPN13        | YLR421C | 11         | 46.8    | 2.6E-07         | 6                           | 0.678                | 0.017 |
|      | RPN15        | YDR363W | 4          | 40.4    | 4.9E-08         | 3                           | 0.609                | 0.050 |
|      | RPT1         | YKL145W | 45         | 47.5    | 3.1E-09         | 37                          | 0.647                | 0.060 |
|      | RPT2         | YDL007W | 46         | 51.9    | 4E-12           | 28                          | 0.595                | 0.086 |
|      | RPT3         | YDR394W | 45         | 64      | 1.3E-08         | 32                          | 0.688                | 0.053 |
| RPT4 | YOR259C      | 58      | 56.3       | 4.4E-09 | 46              | 0.679                       | 0.057                |       |
| RPT5 | YOR117W      | 60      | 63.1       | 7.6E-10 | 42              | 0.669                       | 0.053                |       |
| RPT6 | YGL048C      | 43      | 60.7       | 1.5E-08 | 26              | 0.684                       | 0.044                |       |
| 20S  | PRE1         | YER012W | 23         | 50.5    | 1.7E-09         | 20                          | 0.978                | 0.074 |
|      | PRE2         | YPR103W | 23         | 36.6    | 2.1E-08         | 17                          | 1.033                | 0.063 |
|      | PRE3         | YJL001W | 30         | 70.7    | 7.2E-09         | 23                          | 1.027                | 0.075 |
|      | PRE4         | YFR050C | 31         | 59      | 1.2E-09         | 27                          | 1.005                | 0.080 |
|      | PRE5         | YMR314W | 36         | 80.8    | 7.6E-11         | 31                          | 1.023                | 0.063 |
|      | PRE6         | YOL038W | 19         | 62.2    | 1.8E-10         | 17                          | 1.020                | 0.070 |
|      | PRE7         | YBL041W | 34         | 58.9    | 9.7E-09         | 28                          | 1.022                | 0.064 |
|      | PRE8         | YML092C | 36         | 47.2    | 9.8E-10         | 32                          | 1.013                | 0.069 |
|      | PRE9         | YGR135W | 48         | 75.6    | 6.6E-10         | 36                          | 0.997                | 0.081 |
|      | PRE10        | YOR362C | 25         | 53.8    | 7.5E-09         | 16                          | 1.000                | 0.076 |
|      | SCL1         | YGL011C | 52         | 72.6    | 2.6E-10         | 40                          | 1.017                | 0.066 |
|      | PUP1         | YOR157C | 17         | 30.7    | 2.3E-07         | 14                          | 1.003                | 0.033 |
|      | PUP2         | YGR253C | 32         | 71.5    | 2.5E-09         | 26                          | 1.015                | 0.065 |
| PUP3 | YER094C      | 15      | 39.5       | 9.4E-10 | 14              | 1.023                       | 0.074                |       |
| PIPs | BLM10        | YFL007W | 149        | 34.3    | 4.40E-11        | 115                         | 0.986                | 0.128 |
|      | CDC48        | YDL126C | 9          | 10.3    | 4.00E-07        | 6                           | 0.830                | 0.070 |
|      | Ecm29        | YHL030W | 12         | 6       | 5.40E-07        | 9                           | 1.127                | 0.070 |
|      | EFT2         | YDR385W | 4          | 5.1     | 2.20E-08        | 3                           | 2.497                | 0.281 |
|      | HSP26        | YBR072W | 2          | 13.1    | 1.20E-07        | 2                           | 1.890                | 0.212 |
|      | SSA1         | YAL005C | 33         | 31.9    | 2.80E-08        | 23                          | 1.158                | 0.125 |
|      | SSA2         | YLL024C | 33         | 29.7    | 1.10E-08        | 23                          | 1.160                | 0.195 |
|      | SSB1         | YDL229W | 27         | 33.3    | 4.00E-09        | 17                          | 1.238                | 0.236 |
|      | SSB2         | YNL209W | 26         | 33.3    | 4.00E-09        | 17                          | 1.205                | 0.231 |
|      | SSC1         | YJR045C | 6          | 6.6     | 6.40E-06        | 4                           | 1.455                | 0.178 |
|      | TEF2         | YBR118W | 17         | 32.1    | 6.60E-07        | 11                          | 1.485                | 0.095 |

SILAC ratios: treated/untreated, normalized to Pre10

**Table S3.** Identification and quantitation of the known PIPs by SILAC-MS in Rpn11-TAP-expressing cells before and after treatment with H<sub>2</sub>O<sub>2</sub>.

| ACC#    | 1 mM H2O2  |       |                 |                             |                    |       | 3 mM H2O2  |       |                 |                             |                    |        | 6 mM H2O2  |       |                 |                             |                    |        | name  |
|---------|------------|-------|-----------------|-----------------------------|--------------------|-------|------------|-------|-----------------|-----------------------------|--------------------|--------|------------|-------|-----------------|-----------------------------|--------------------|--------|-------|
|         | Num Unique | % Cov | Best Expect Val | # Pep used for SILAC Ratios | SILAC Ratios (Avg) | STDEV | Num Unique | % Cov | Best Expect Val | # Pep used for SILAC Ratios | SILAC Ratios (Avg) | St Dev | Num Unique | % Cov | Best Expect Val | # Pep used for SILAC Ratios | SILAC Ratios (Avg) | STDEV  |       |
| YHL030W | 9          | 4.6   | 2.10E-05        | 8                           | 1.84               | 0.073 | 63         | 35.9  | 1.30E-08        | 42                          | 16.39              | 4.880  | 75         | 39.8  | 6.90E-09        | 48                          | 52.76              | 17.595 | ECM29 |
| YBR272C | 18         | 30.8  | 7.40E-08        | 14                          | 2.14               | 0.040 | 24         | 43.3  | 8.80E-08        | 17                          | 2.62               | 0.351  | 21         | 33.8  | 2.00E-09        | 14                          | 4.30               | 0.598  | HSM3  |
| YPL106C | 10         | 16.6  | 6.90E-07        | 6                           | 1.38               | 0.061 | 26         | 31.9  | 6.50E-08        | 17                          | 2.68               | 0.306  | 24         | 31    | 2.80E-07        | 19                          | 3.56               | 0.466  | SSE1  |
| YJL008C | 9          | 10.4  | 4.00E-07        | 5                           | 1.23               | 0.088 | 11         | 23.2  | 8.60E-08        | 9                           | 1.96               | 0.129  | 11         | 15.5  | 2.40E-07        | 7                           | 2.70               | 0.271  | CCT8  |
| YIL142W | 5          | 9.5   | 1.60E-06        | 3                           | 1.33               | 0.031 | 14         | 26.8  | 9.60E-08        | 9                           | 2.25               | 0.331  | 9          | 19    | 1.10E-07        | 5                           | 2.64               | 0.447  | CCT2  |
| YDL143W | 3          | 11.4  | 8.30E-05        | 3                           | 1.01               | 0.064 | 7          | 16.7  | 6.50E-10        | 6                           | 2.29               | 0.231  | 11         | 25.9  | 2.60E-07        | 8                           | 2.63               | 0.267  | CCT4  |
| YDL229W | 48         | 48.9  | 3.00E-10        | 40                          | 0.87               | 0.086 | 51         | 54.2  | 2.80E-10        | 35                          | 1.97               | 0.165  | 49         | 52.9  | 5.00E-10        | 41                          | 2.57               | 0.259  | SSB1  |
| YNL209W | 49         | 52.4  | 3.00E-10        | 41                          | 0.87               | 0.086 | 52         | 54.2  | 2.80E-10        | 36                          | 1.98               | 0.169  | 51         | 56.3  | 5.00E-10        | 42                          | 2.57               | 0.257  | SSB2  |
| YDR188W | 4          | 6     | 3.20E-05        | 3                           | 1.28               | 0.057 | 6          | 12.5  | 3.70E-05        | 6                           | 2.42               | 0.393  | 7          | 11.9  | 4.80E-06        | 2                           | 2.31               | 0.028  | CCT6  |
| YJR045C | 8          | 13.9  | 4.50E-07        | 6                           | 1.35               | 0.092 | 18         | 26.1  | 2.30E-07        | 14                          | 2.04               | 0.258  | 21         | 26.5  | 1.10E-08        | 16                          | 2.29               | 0.168  | SSC1  |
| YDL126C | 20         | 24.3  | 3.60E-07        | 18                          | 1.66               | 0.087 | 24         | 29.9  | 4.20E-09        | 20                          | 1.84               | 0.201  | 28         | 31.7  | 6.80E-09        | 17                          | 2.10               | 0.287  | CDC48 |
| YBR072W | 13         | 40.7  | 3.70E-08        | 10                          | 1.59               | 0.080 | 20         | 52.8  | 3.20E-10        | 12                          | 1.59               | 0.212  | 19         | 57    | 5.60E-10        | 11                          | 1.92               | 0.278  | HSP26 |
| YJL111W | 9          | 15.3  | 3.00E-08        | 5                           | 1.27               | 0.059 | 11         | 17.6  | 2.40E-09        | 8                           | 1.70               | 0.193  | 5          | 7.8   | 4.00E-09        | 3                           | 1.78               | 0.121  | CCT7  |
| YAL005C | 56         | 52.3  | 1.40E-09        | 53                          | 1.20               | 0.091 | 60         | 45.5  | 5.50E-11        | 43                          | 1.44               | 0.105  | 68         | 48.8  | 4.00E-10        | 47                          | 1.56               | 0.206  | SSA1  |
| YLL024C | 57         | 55.9  | 1.40E-09        | 50                          | 1.13               | 0.097 | 67         | 51.6  | 5.50E-11        | 48                          | 1.42               | 0.115  | 74         | 54.1  | 3.00E-11        | 49                          | 1.54               | 0.178  | SSA2  |
| YER151C | 11         | 12.6  | 8.60E-07        | 7                           | 0.45               | 0.262 | 22         | 17.4  | 5.60E-10        | 14                          | 1.17               | 0.120  | 17         | 17.7  | 2.20E-10        | 12                          | 1.11               | 0.131  | UBP3  |
| YGR232W | 33         | 88.2  | 1.80E-09        | 26                          | 1.22               | 0.080 | 45         | 95.6  | 2.10E-10        | 32                          | 1.16               | 0.098  | 36         | 94.7  | 1.20E-10        | 29                          | 0.90               | 0.080  | NAS6  |
| YFL007W | 10         | 4.3   | 8.20E-07        | 8                           | 0.89               | 0.121 | 24         | 10.5  | 3.20E-08        | 17                          | 0.47               | 0.060  | 12         | 6.8   | 1.30E-07        | 8                           | 0.20               | 0.036  | BLM10 |

SILAC ratios: treated /untreated, normalized to Rpn11

**Table S4.** SILAC-based quantitative comparison of the composition of the 26S proteasome in wild-type and *ecm29Δ* cells in the absence of H<sub>2</sub>O<sub>2</sub>-induced stress.

|      | Name    | Acc #   | Num Unique | % Cov   | Best Expect Val | # Pep used for SILAC Ratios | Average SILAC Ratios | STDEV |
|------|---------|---------|------------|---------|-----------------|-----------------------------|----------------------|-------|
| 19S  | RPN1    | YHR027C | 128        | 69.6    | 4.8E-10         | 87                          | 0.971                | 0.056 |
|      | RPN2    | YIL075C | 127        | 62.4    | 1.6E-10         | 96                          | 1.001                | 0.067 |
|      | RPN3    | YER021W | 59         | 62.3    | 3.2E-10         | 42                          | 0.988                | 0.061 |
|      | RPN5    | YDL147W | 61         | 61.1    | 1.3E-08         | 46                          | 0.992                | 0.063 |
|      | RPN6    | YDL097C | 52         | 73.0    | 4E-09           | 35                          | 0.992                | 0.062 |
|      | RPN7    | YPR108W | 56         | 59.7    | 4.9E-09         | 44                          | 1.011                | 0.078 |
|      | RPN8    | YOR261C | 44         | 76.0    | 8.9E-09         | 32                          | 0.978                | 0.055 |
|      | RPN9    | YDR427W | 60         | 60.8    | 4.5E-09         | 41                          | 1.010                | 0.071 |
|      | RPN10   | YHR200W | 31         | 54.9    | 1.1E-10         | 18                          | 0.943                | 0.049 |
|      | RPN11   | YFR004W | 47         | 62.7    | 6.3E-09         | 41                          | 1.000                | 0.058 |
|      | RPN12   | YFR052W | 35         | 74.1    | 6.5E-10         | 24                          | 0.994                | 0.053 |
|      | RPN13   | YLR421C | 15         | 59.6    | 2.9E-09         | 9                           | 0.950                | 0.045 |
|      | RPN15   | YDR363W | 9          | 80.9    | 1.50E-07        | 7                           | 1.040                | 0.101 |
|      | RPT1    | YKL145W | 65         | 67.0    | 6.9E-10         | 48                          | 0.985                | 0.059 |
|      | RPT2    | YDL007W | 63         | 77.8    | 3E-09           | 42                          | 0.969                | 0.061 |
|      | RPT3    | YDR394W | 61         | 86.4    | 1.9E-10         | 46                          | 0.990                | 0.089 |
|      | RPT4    | YOR259C | 66         | 70.0    | 5.8E-09         | 50                          | 0.996                | 0.061 |
|      | RPT5    | YOR117W | 71         | 79.7    | 1.6E-09         | 49                          | 0.993                | 0.066 |
| RPT6 | YGL048C | 60      | 72.6       | 2.1E-08 | 44              | 0.983                       | 0.058                |       |
| 20S  | PRE1    | YER012W | 16         | 43.9    | 2.00E-08        | 6                           | 0.896                | 0.044 |
|      | PRE2    | YPR103W | 25         | 56.4    | 6.2E-10         | 15                          | 0.877                | 0.022 |
|      | PRE3    | YJL001W | 27         | 75.8    | 1.3E-09         | 12                          | 0.883                | 0.019 |
|      | PRE4    | YFR050C | 28         | 69.5    | 1.2E-08         | 14                          | 0.969                | 0.119 |
|      | PRE5    | YMR314W | 33         | 80.8    | 9.6E-10         | 17                          | 0.880                | 0.029 |
|      | PRE6    | YOL038W | 28         | 74.0    | 5.8E-10         | 15                          | 0.885                | 0.034 |
|      | PRE7    | YBL041W | 32         | 65.1    | 1.2E-10         | 19                          | 0.926                | 0.072 |
|      | PRE8    | YML092C | 39         | 87.6    | 4E-09           | 14                          | 0.910                | 0.059 |
|      | PRE9    | YGR135W | 43         | 87.2    | 1.1E-09         | 11                          | 0.899                | 0.019 |
|      | PRE10   | YOR362C | 25         | 56.6    | 5.9E-08         | 12                          | 0.926                | 0.075 |
|      | SCL1    | YGL011C | 43         | 89.7    | 3E-09           | 17                          | 0.895                | 0.047 |
|      | PUP1    | YOR157C | 14         | 45.2    | 5.7E-08         | 6                           | 0.888                | 0.032 |
|      | PUP2    | YGR253C | 36         | 87.3    | 5.7E-08         | 19                          | 0.890                | 0.024 |
|      | PUP3    | YER094C | 19         | 55.1    | 2.9E-10         | 12                          | 0.968                | 0.030 |

SILAC ratios: wt/*ecm29Δ*, normalized to Rpn11.

**Table S5.** SILAC-based quantitative comparison of the composition of the 26S proteasome in wild-type and *ecm29Δ* cells after H<sub>2</sub>O<sub>2</sub>-induced stress.

|      |         | Acc #   | Num Unique | % Cov   | Best Expect Val | # Pep used for SILAC Ratios | Average SILAC Ratios | STDEV |
|------|---------|---------|------------|---------|-----------------|-----------------------------|----------------------|-------|
| 19S  | RPN1    | YHR027C | 56         | 31.4    | 4.8E-10         | 24                          | 0.963                | 0.075 |
|      | RPN2    | YIL075C | 53         | 24.6    | 4.1E-09         | 27                          | 0.945                | 0.056 |
|      | RPN3    | YER021W | 30         | 37.1    | 4.9E-10         | 12                          | 1.051                | 0.058 |
|      | RPN5    | YDL147W | 22         | 24.5    | 4.7E-09         | 10                          | 0.992                | 0.099 |
|      | RPN6    | YDL097C | 29         | 33.6    | 2.2E-09         | 24                          | 0.988                | 0.061 |
|      | RPN7    | YPR108W | 28         | 31.5    | 8.2E-09         | 15                          | 0.975                | 0.084 |
|      | RPN8    | YOR261C | 23         | 49.7    | 1.1E-08         | 6                           | 1.055                | 0.050 |
|      | RPN9    | YDR427W | 29         | 32.1    | 5.9E-10         | 14                          | 0.992                | 0.063 |
|      | RPN10   | YHR200W | 13         | 29.5    | 2E-09           | 9                           | 1.020                | 0.070 |
|      | RPN11   | YFR004W | 12         | 18.6    | 9.1E-09         | 8                           | 1.000                | 0.044 |
|      | RPN12   | YFR052W | 23         | 40.9    | 2.4E-09         | 11                          | 0.989                | 0.077 |
|      | RPN13   | YLR421C | 7          | 32.7    | 2.2E-09         | 4                           | 0.925                | 0.067 |
|      | RPN15   | YDR363W | 4          | 41.6    | 1.5E-08         | 3                           | 1.065                | 0.038 |
|      | RPT1    | YKL145W | 44         | 51.8    | 1.2E-08         | 19                          | 0.937                | 0.038 |
|      | RPT2    | YDL007W | 42         | 52.6    | 7.7E-10         | 18                          | 0.960                | 0.079 |
|      | RPT3    | YDR394W | 32         | 34.3    | 3.6E-09         | 14                          | 0.967                | 0.046 |
|      | RPT4    | YOR259C | 34         | 39.4    | 2.1E-09         | 19                          | 0.868                | 0.068 |
|      | RPT5    | YOR117W | 47         | 60.1    | 2.5E-09         | 21                          | 0.945                | 0.081 |
| RPT6 | YGL048C | 35      | 46.2       | 4.9E-09 | 20              | 0.974                       | 0.079                |       |
| 20S  | PRE1    | YER012W | 5          | 16.7    | 0.00035         | 3                           | 0.558                | 0.058 |
|      | PRE2    | YPR103W | 10         | 17.8    | 9.1E-07         | 5                           | 0.501                | 0.035 |
|      | PRE3    | YJL001W | 2          | 12.6    | 2.80E-08        | 1                           | 0.534                | --    |
|      | PRE4    | YFR050C | 8          | 36.1    | 7.7E-08         | 4                           | 0.371                | 0.119 |
|      | PRE5    | YMR314W | 12         | 43.2    | 8.1E-10         | 6                           | 0.409                | 0.091 |
|      | PRE6    | YOL038W | 10         | 41.7    | 3.1E-08         | 5                           | 0.517                | 0.021 |
|      | PRE7    | YBL041W | 7          | 17.8    | 0.000002        | 5                           | 0.503                | 0.015 |
|      | PRE8    | YML092C | 9          | 28      | 2.6E-08         | 7                           | 0.471                | 0.109 |
|      | PRE9    | YGR135W | 10         | 26.4    | 7.6E-10         | 4                           | 0.525                | 0.028 |
|      | PRE10   | YOR362C | 9          | 22.9    | 2.1E-07         | 5                           | 0.497                | 0.037 |
|      | SCL1    | YGL011C | 22         | 48      | 5.6E-08         | 5                           | 0.333                | 0.094 |
|      | PUP1    | YOR157C | 2          | 4.6     | 3.1E-06         | 2                           | 0.498                | 0.020 |
|      | PUP2    | YGR253C | 9          | 25.8    | 3.9E-08         | 5                           | 0.449                | 0.114 |
|      | PUP3    | YER094C | 7          | 32.2    | 2.1E-10         | 4                           | 0.534                | 0.044 |

SILAC ratios: wt/*ecm29Δ*, normalized to Rpn11.

**Table S6.** Yeast strains generated for this study.

| <b>Name</b> | <b>Relevant genotype</b>                                     |
|-------------|--------------------------------------------------------------|
| LH#001      | <i>a bar1 pep4::URA3 RPN11-TAP::TRP1</i>                     |
| LH#002      | <i>a bar1 pep4::URA3 RPN11-TAP::KAN arg4::hyg lys2::Zeo</i>  |
| LH#003      | <i>a bar1 pep4::URA3 RPN11-TAP::TRP1 ecm29::KAN</i>          |
| LH#004      | <i>a bar1 pep4::URA3 RPN11-TAP::TRP1 ECM29-HA:KAN</i>        |
| LH#005      | <i>a bar1 pep4::URA3 RPN11-TAP::TRP1 yap1::KAN</i>           |
| LH#006      | <i>a bar1 pep4::URA3 Ecm29-TAP::KAN arg4::hyg lys2::Zeo</i>  |
| LH#007      | <i>a bar1 pep4::URA3 RPN1-HBH::TRP1</i>                      |
| LH#008      | <i>a bar1 pep4::URA3 RPN10-HBH::TRP1</i>                     |
| LH#009      | <i>a bar1 pep4::URA3 RPT5-TAP::TRP1 arg4::hyg lys2::Zeo</i>  |
| LH#010      | <i>a bar1 pep4::URA3 Pre10-TAP::TRP1 arg4::hyg lys2::Zeo</i> |
